# Supplementary material for: Real-time imaging of viscosity in the mitochondrial matrix by a red-emissive molecular rotor
Source: Royal Society of Chemistry journal article supplement (doi:10.1039/d1ay00366f), 2021-01-01
Supplement: d1ay00366f1.pdf [file d1ay00366f1.pdf]

## Supporting Information

### Real-time Imaging Viscosity in Mitochondrial Matrix by a Red-emissive Molecular Rotor

Lin Yuan,<sup>†a</sup> Dong Wang,<sup>†a</sup> Shan Shan,<sup>†a</sup> Juan Chen,<sup>a</sup> Wei Huang,<sup>a</sup> Zhengjie Liu,<sup>\*a</sup>  
Guangmei Han,<sup>a</sup> Xiaohe Tian,<sup>a</sup> Ruilong Zhang,<sup>a,b</sup> Zhongping Zhang<sup>a,b</sup>

<sup>a</sup>*School of Chemistry and Chemical Engineering, and Institute of Physical Science and Information Technology, Anhui University, Hefei 230601, China.*

<sup>b</sup>*Key Laboratory of Structure and Functional Regulation of Hybrid Materials (Anhui University), Ministry of Education, Hefei, Anhui 230601, China*

<sup>†</sup>*These authors contributed equally to this work.*

<sup>\*</sup>*E-mail address: [zjliu@ahu.edu.cn](mailto:zjliu@ahu.edu.cn)*

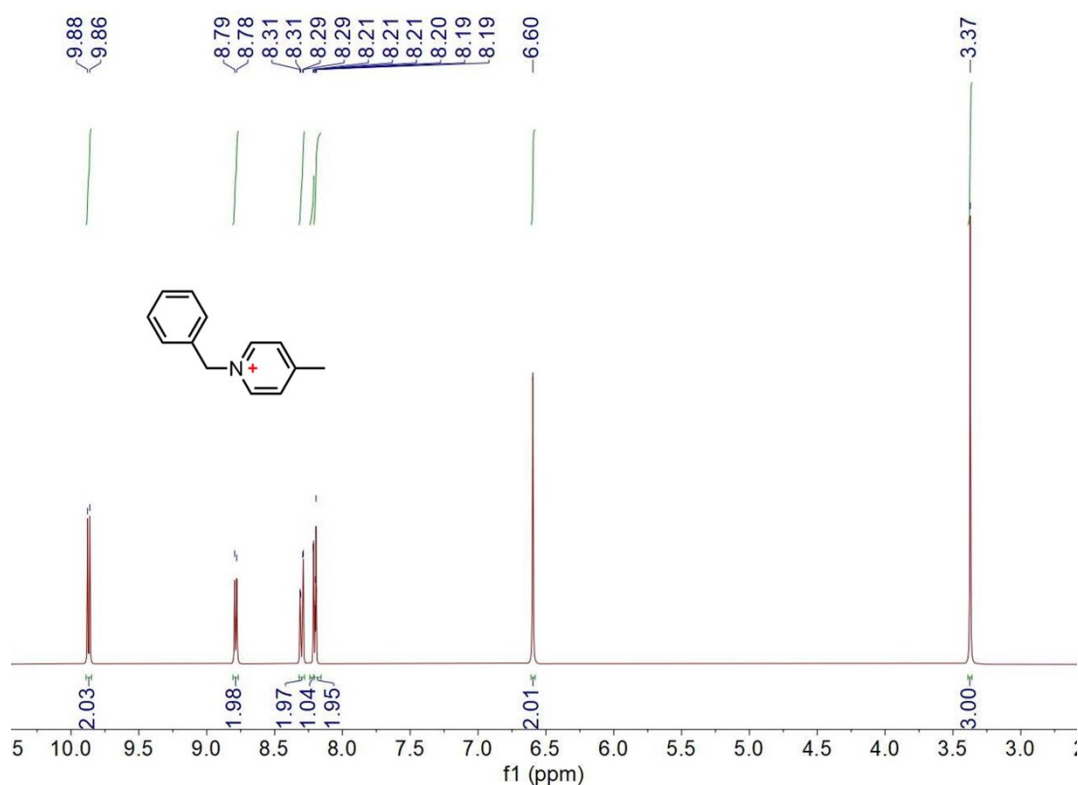

**Fig. S1** <sup>1</sup>H-NMR spectrum of compound 1 in deuterated methanol.

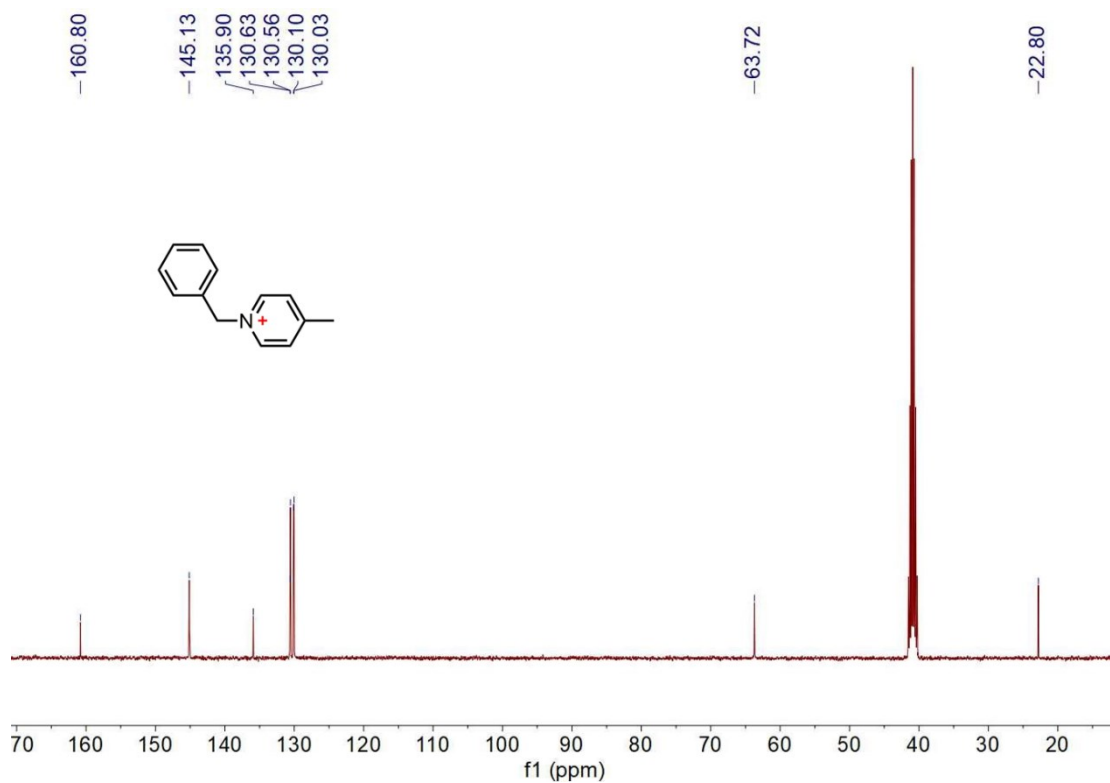

**Fig. S2**  $^{13}\text{C}$ -NMR spectrum of compound 1 in deuterated methanol.

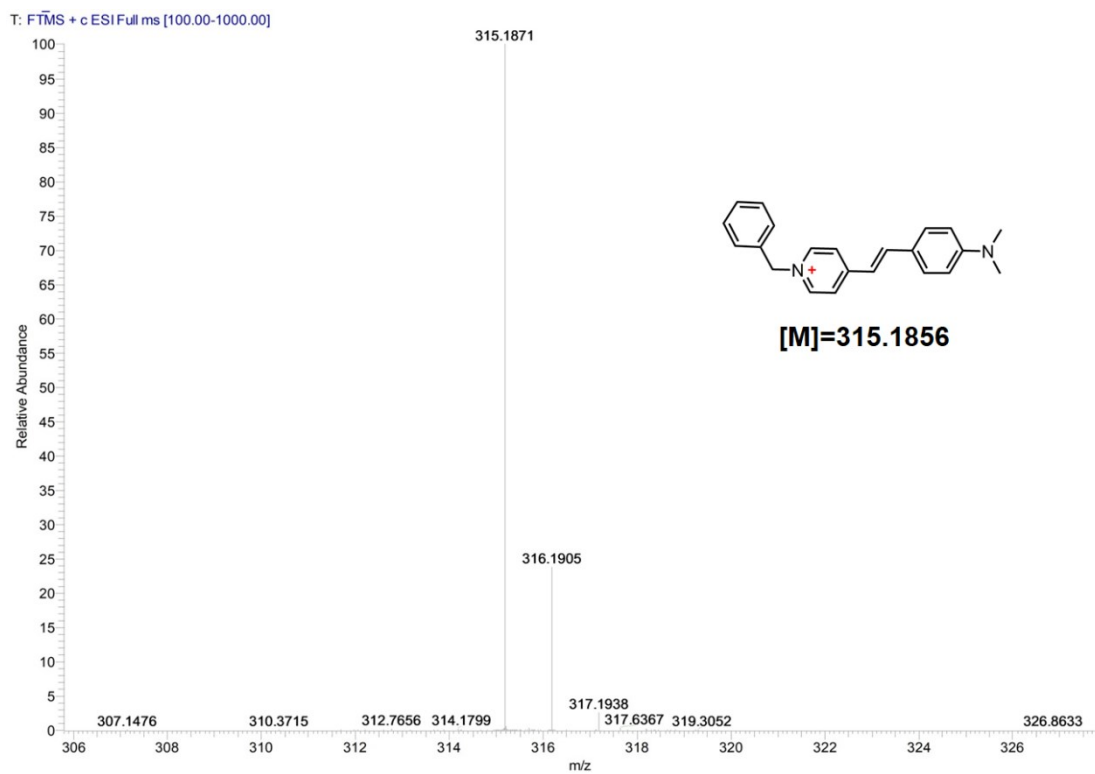

**Fig. S3** HR-MS spectrum of BSP.

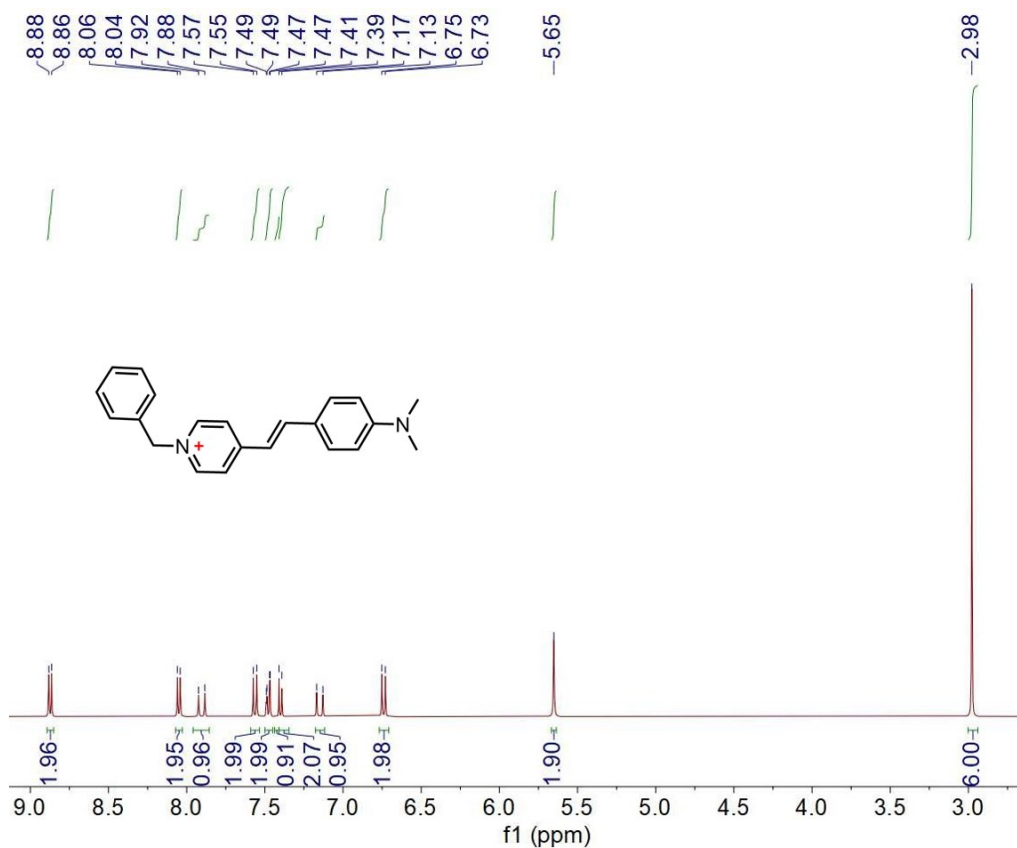

**Fig. S4** <sup>1</sup>H-NMR spectrum of BSP in d<sub>6</sub>-DMSO.

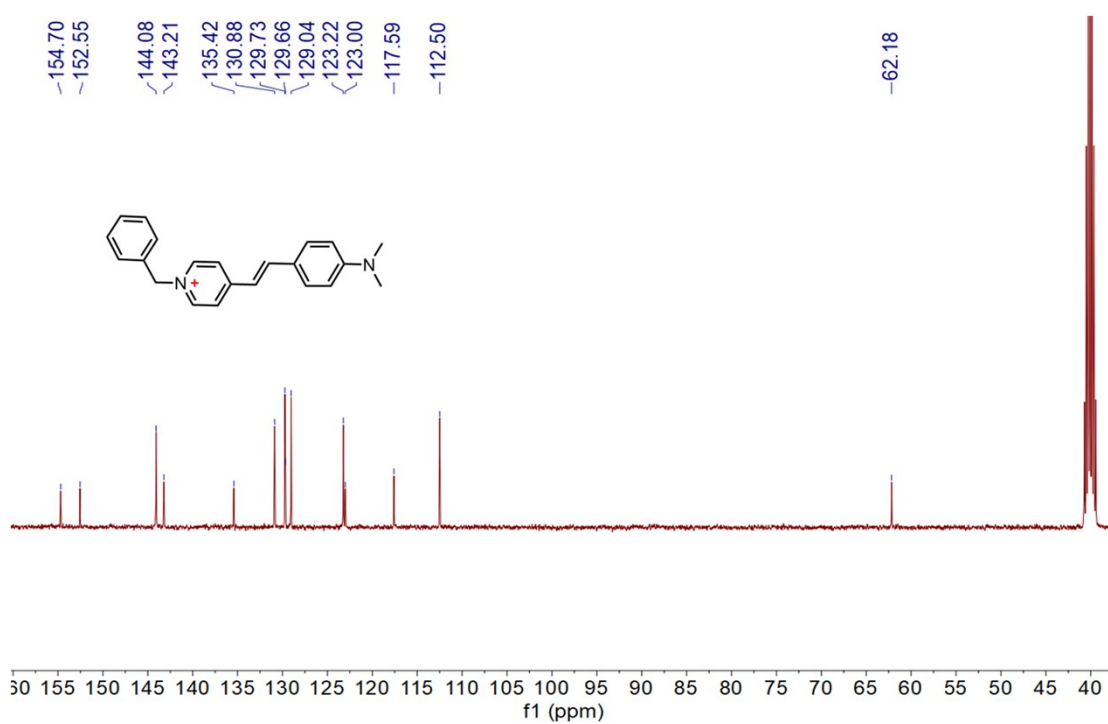

**Fig. S5** <sup>13</sup>C-NMR spectrum of BSP in d<sub>6</sub>-DMSO.

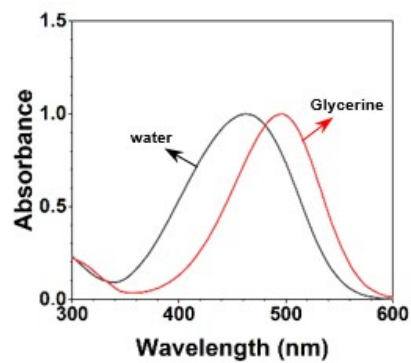

**Fig. S6** Absorption spectrum of BSP in PBS and glycerine.

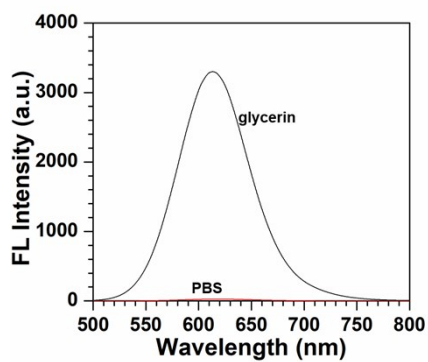

**Fig. S7** Fluorescence spectra of the BSP probe in PBS and glycerine.

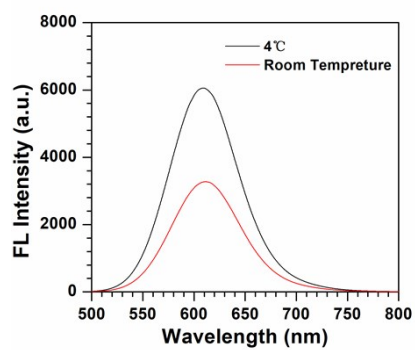

**Fig. S8** Temperature effects of probe BSP (10  $\mu$ M) in glycerine.

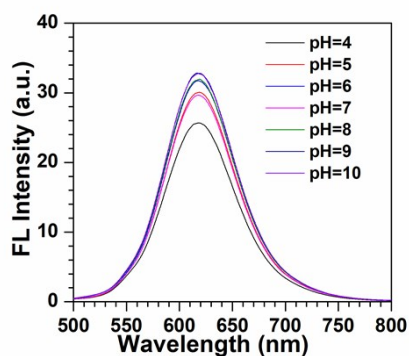

**Fig. S9** pH effects of probe BSP (10  $\mu$ M) in PBS.

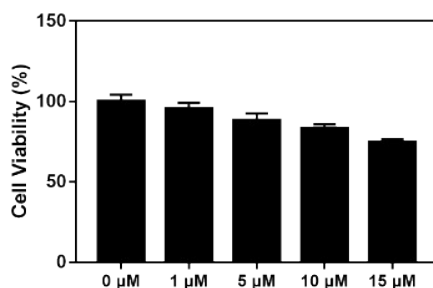

**Fig. S10** Hep G2 cell viability in the presence of BSP measured by the MTT assay. The error bars represent the mean errors from 5 measurements.

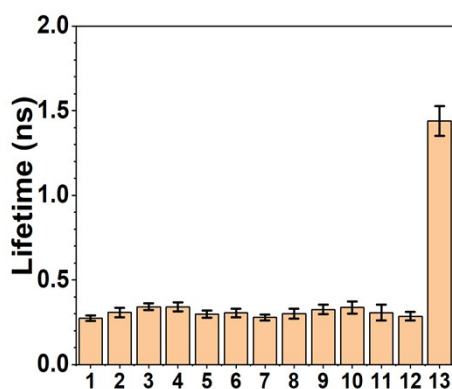

**Fig. S11** The fluorescence lifetime selectivity of BSP (10  $\mu$ M) to various analytes: 1: blank, 2: RNA, 3: DNA, 4: BSA, 5:  $\text{Ca}^{2+}$ , 6:  $\text{Mg}^{2+}$ , 7:  $\text{H}_2\text{O}_2$ , 8:  $\text{HClO}$ , 9:  $\text{H}_2\text{S}$ , 10: Cys, 11: Lys, 12: Trp, 13: glycerine. The error bars represent the mean errors from 3 tests.

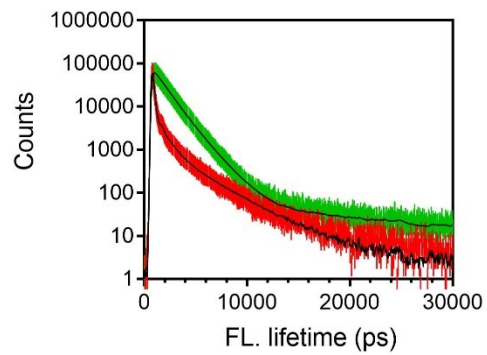

**Fig. S12** Fluorescence lifetime decays spectra of BSP in PBS (red) and glycerine (green).
